# Supplementary material
Source: MDPI journal article supplement (https://www.mdpi.com/2312-7481/6/1/12)
Supplement: s1 [file s1]

# Spontaneous magnetization and optical activity in the chiral series $\{(L\text{-proline})_n V_x [\text{Cr}(\text{CN})_6]\}$ ( $0 < n < 3$ )

Bárbara Rodríguez-García, and Jose Ramon Galan-Mascaros

## Table of contents

|           | page |
|-----------|------|
| Figure S1 | 2    |
| Figure S2 | 3    |
| Figure S3 | 4    |

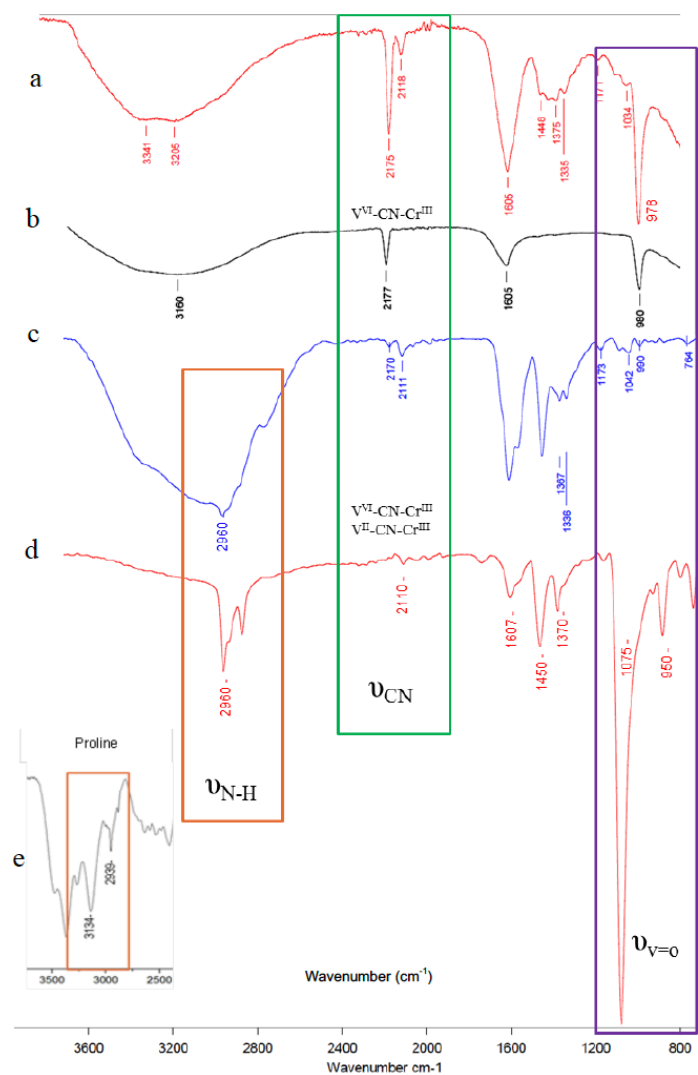

**Figure S1.** FT-IR spectra of **VCr0**: as prepared (a), and after 24 h exposed to air (b); of **VCr1**, as prepared (c) and after 24 h exposed to air (d); and of L-proline (e).

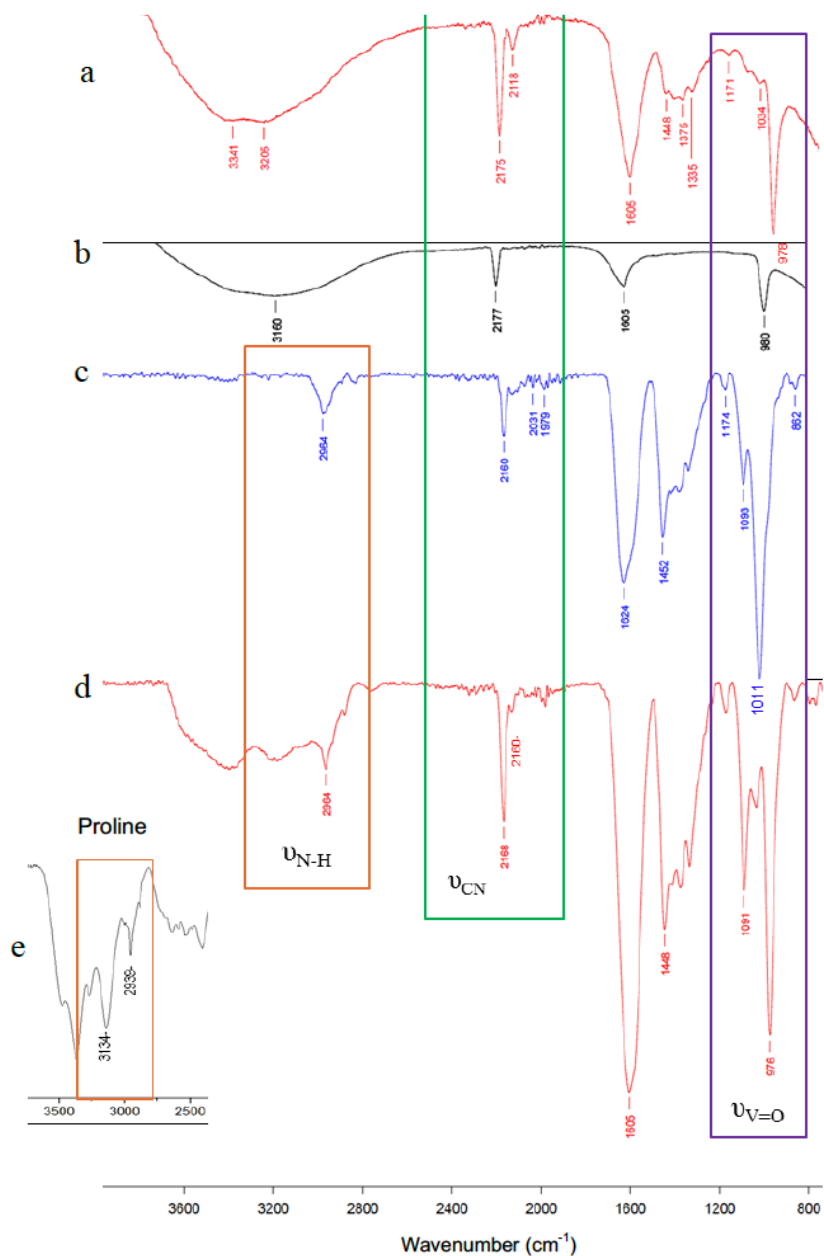

**Figure S2.** FT-IR spectra of **VCr0**: as prepared (a), and after 24 h exposed to air (b); of **VCr2**, as prepared (c) and after 24 h exposed to air (d); and of L-proline (e).

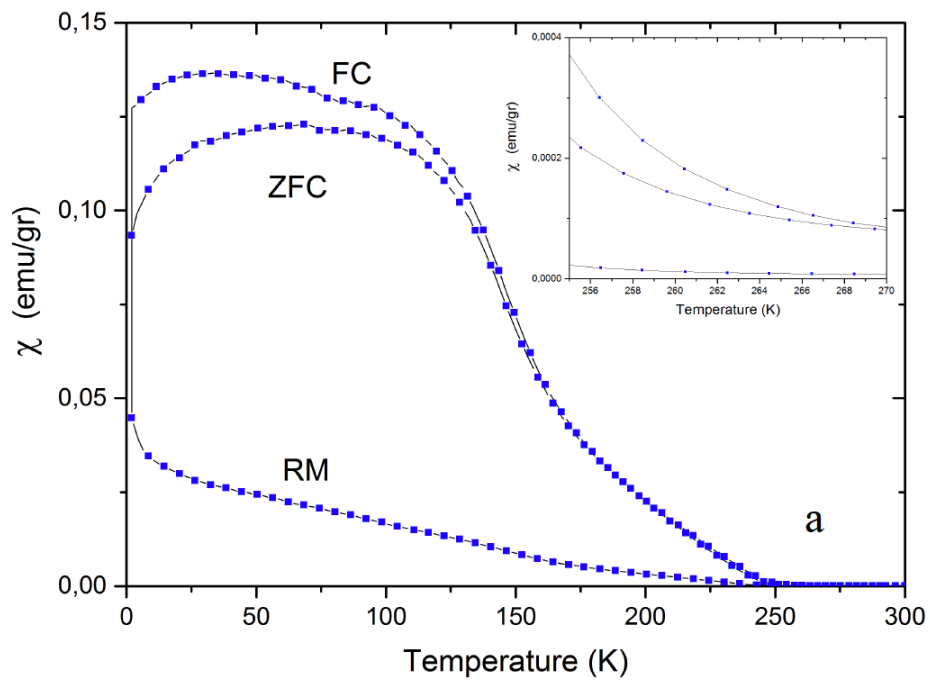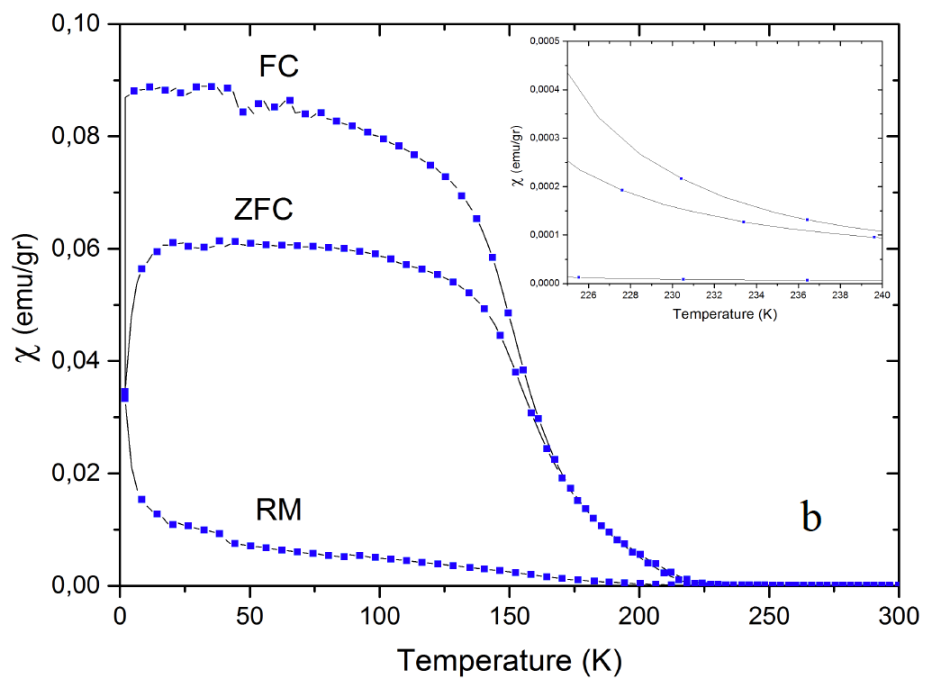

**Figure S3.** ZFC/FC/RM data for VCr1 (a) and after 24 h exposed to air (b). Applied field 25 Oe.
